# Supplementary material for: Catalytic etherification of glycerol with short chain alkyl alcohols in the presence of Lewis acids
Source: Royal Society of Chemistry journal article supplement (doi:10.1039/c3gc36944g), 2013-01-01

## Electronic Supporting Information

### Catalytic etherification of glycerol with short chain alkyl alcohols in the presence of Lewis acids

Fei Liu,<sup>a</sup> Karine De Oliveira Vigier,<sup>a</sup> Marc Pera-Titus,<sup>b</sup> Yannick Pouilloux,<sup>a</sup> Jean-Marc Clacens,<sup>b</sup> Floryan Decampo<sup>b\*</sup> and François Jérôme<sup>a\*</sup>

<sup>a</sup> Institut de Chimie des Milieux et Matériaux de Poitiers, CNRS/Université de Poitiers/ENSIP, 1, rue Marcel Doré, 86022 Poitiers Cedex, France.

<sup>b</sup> Eco-efficient Products and Processes laboratory, UMI 3464 CNRS/Rhodia China. 3966 Jin Du Road, Xin Zhuang Industrial Zone, Shanghai 201108, China

\* Corresponding author: [francois.jerome@univ-poitiers.fr](mailto:francois.jerome@univ-poitiers.fr), [floryan.decampo@ap.rhodia.com](mailto:floryan.decampo@ap.rhodia.com)

#### List of tested metal triflimidates that were found inefficient in the acid-catalyzed etherification of glycerol with n-butanol:

Li(TFSI), K(TFSI), Ca(TFSI)<sub>2</sub>, Cu(TFSI)<sub>2</sub>, Zn(TFSI)<sub>2</sub>, Y(TFSI)<sub>3</sub>, La(TFSI)<sub>3</sub>, Ce(TFSI)<sub>3</sub>, Ti(TFSI)<sub>4</sub>

#### Catalysis in the presence of basic catalysts:

Conditions: glycerol/*n*-butanol molar ratio = 4, 150°C, 6.5 mol% of catalyst, 24h

Result: Although glycerol was converted with 50%, 12% and 1% in the presence of NaOH, K<sub>2</sub>CO<sub>3</sub> and 1,5,7-Triazabicyclo[4.4.0]dec-5-ene, respectively, *n*-butanol was not converted and only formation glycerol-derived unidentified product was observed.

*Mono ethers obtained from 1,2-propylene glycol (mixture of regioisomer)*

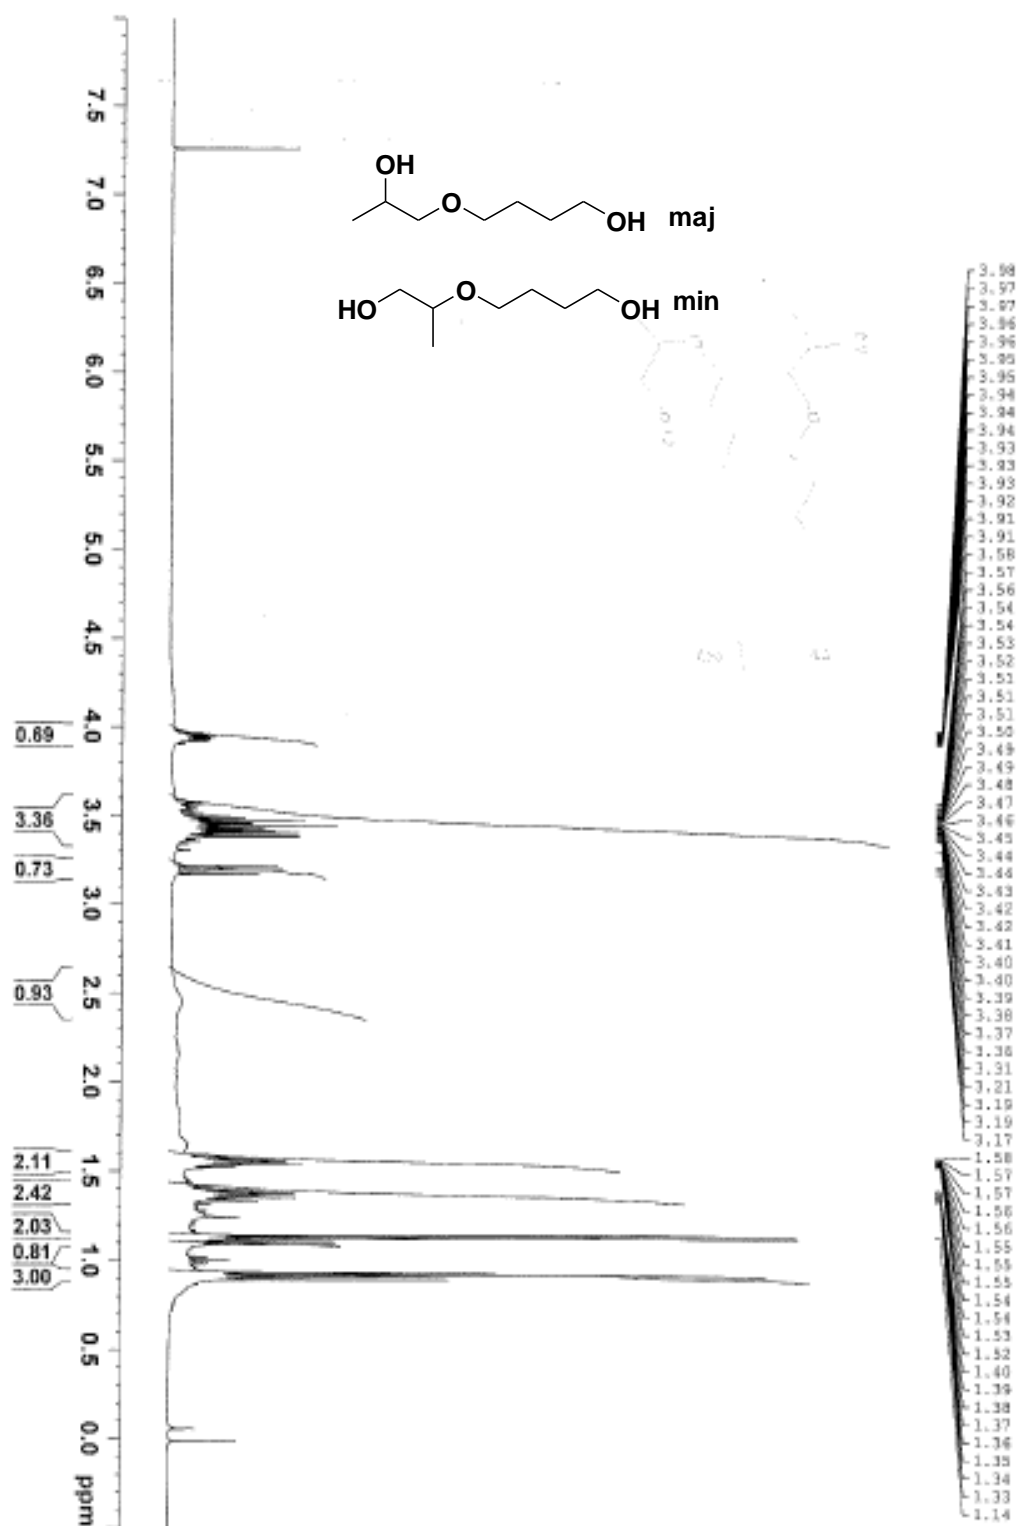

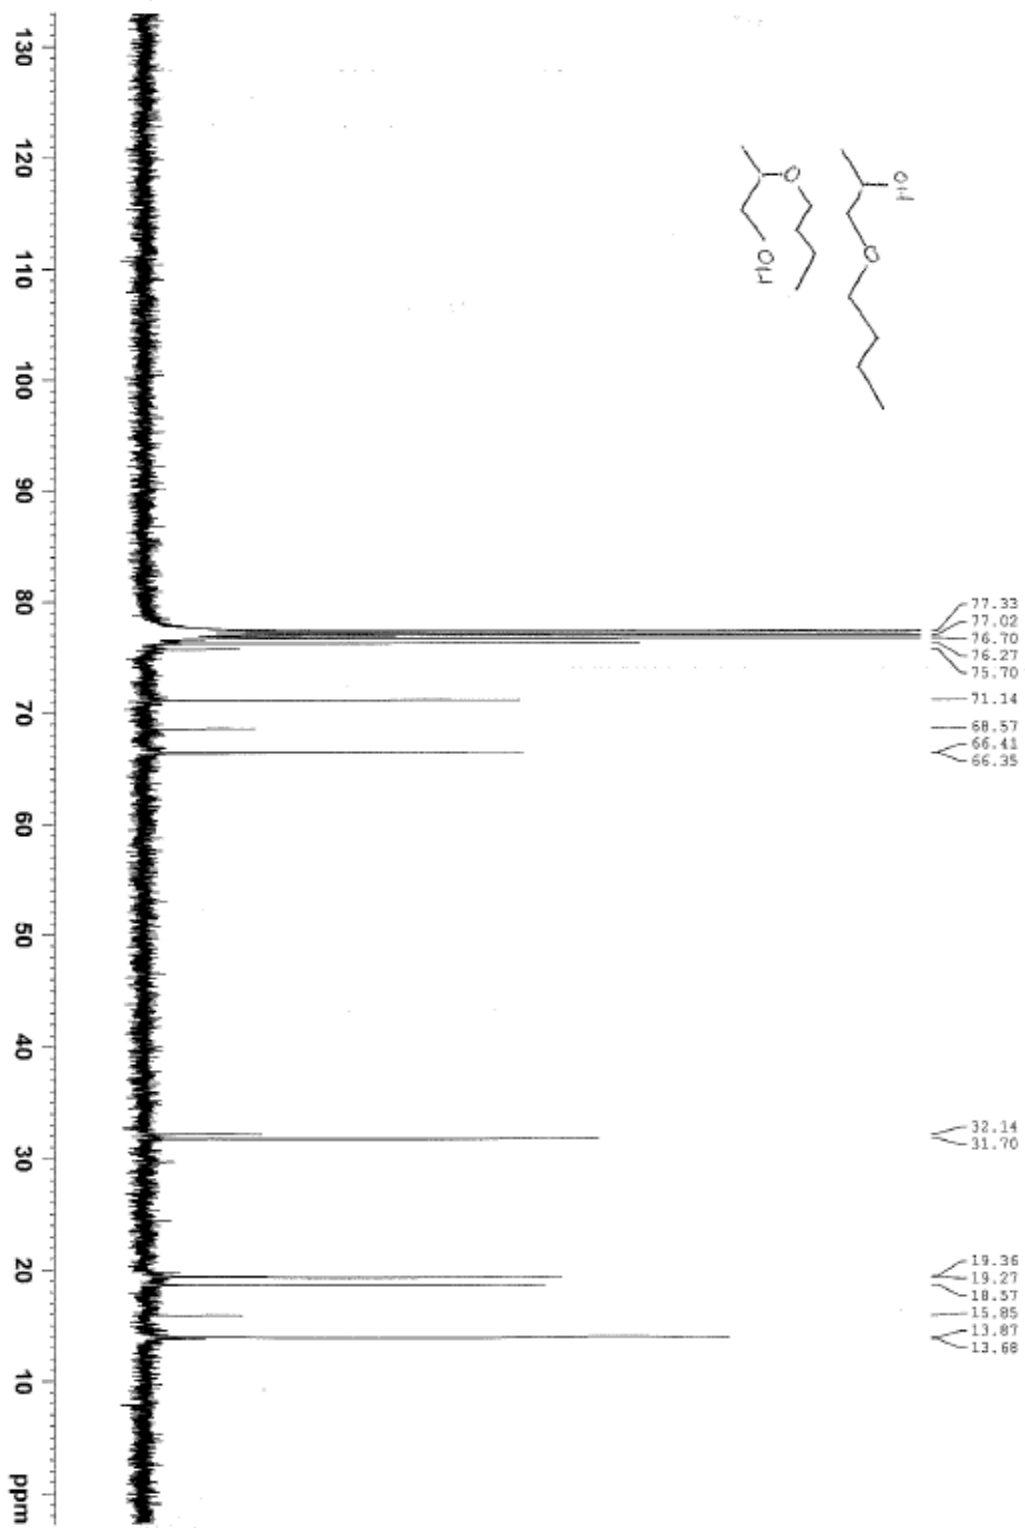

Mono ethers obtained from 1,3-propanediol:

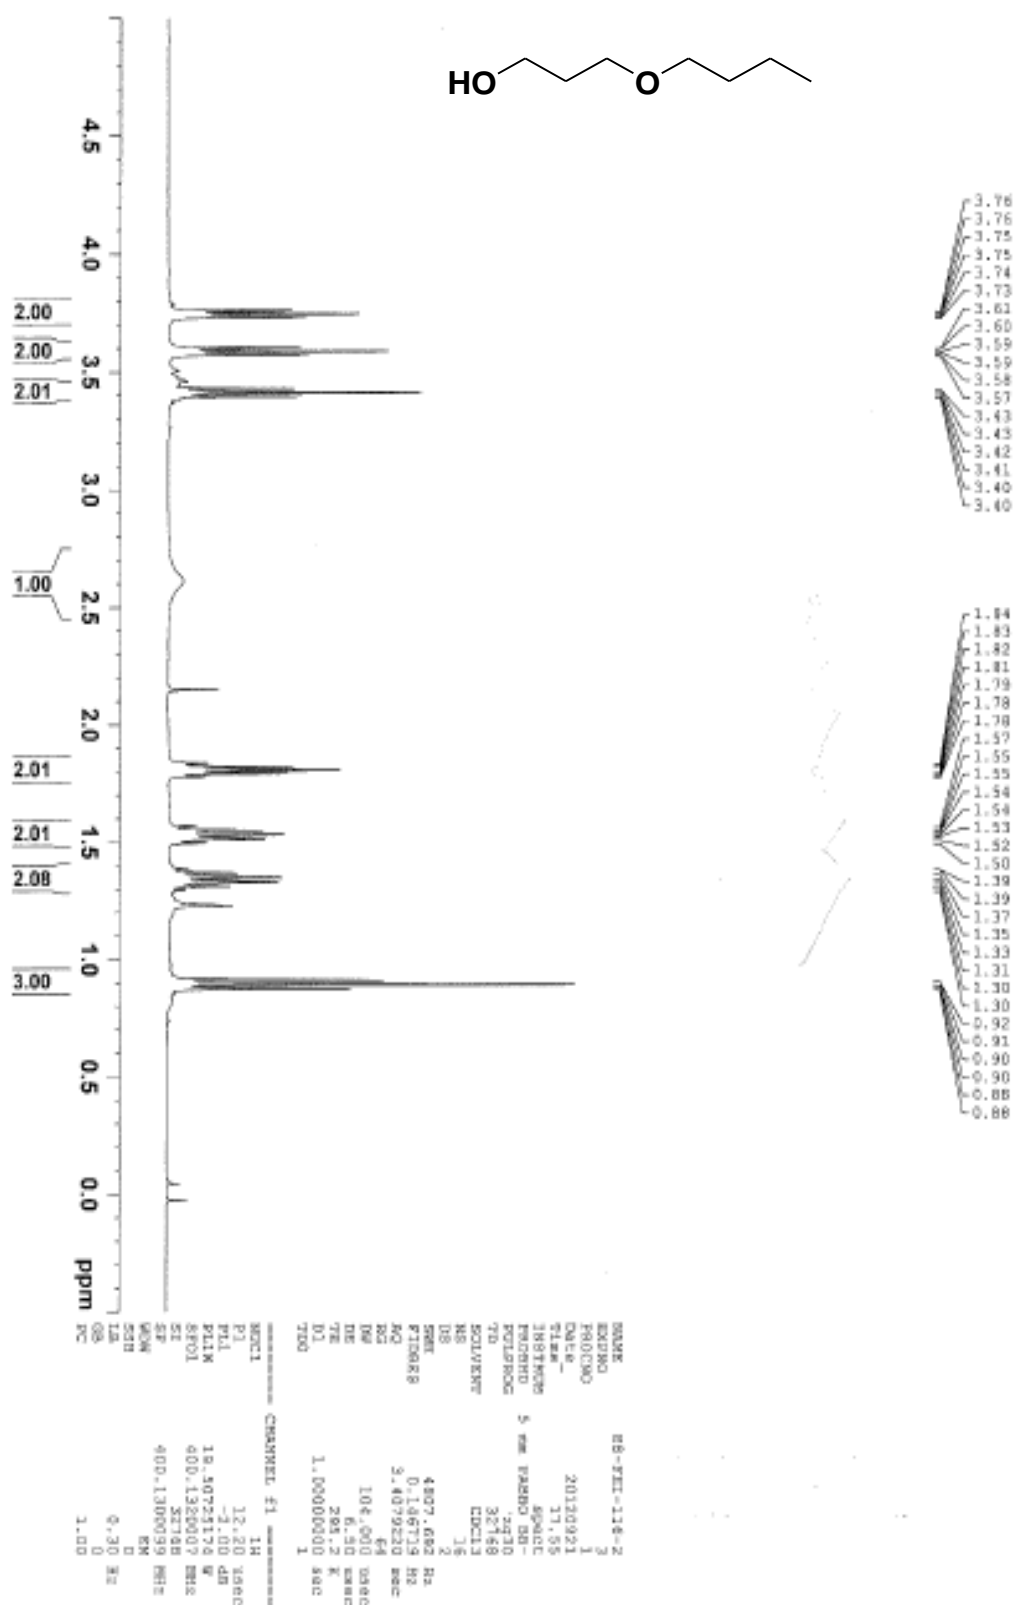

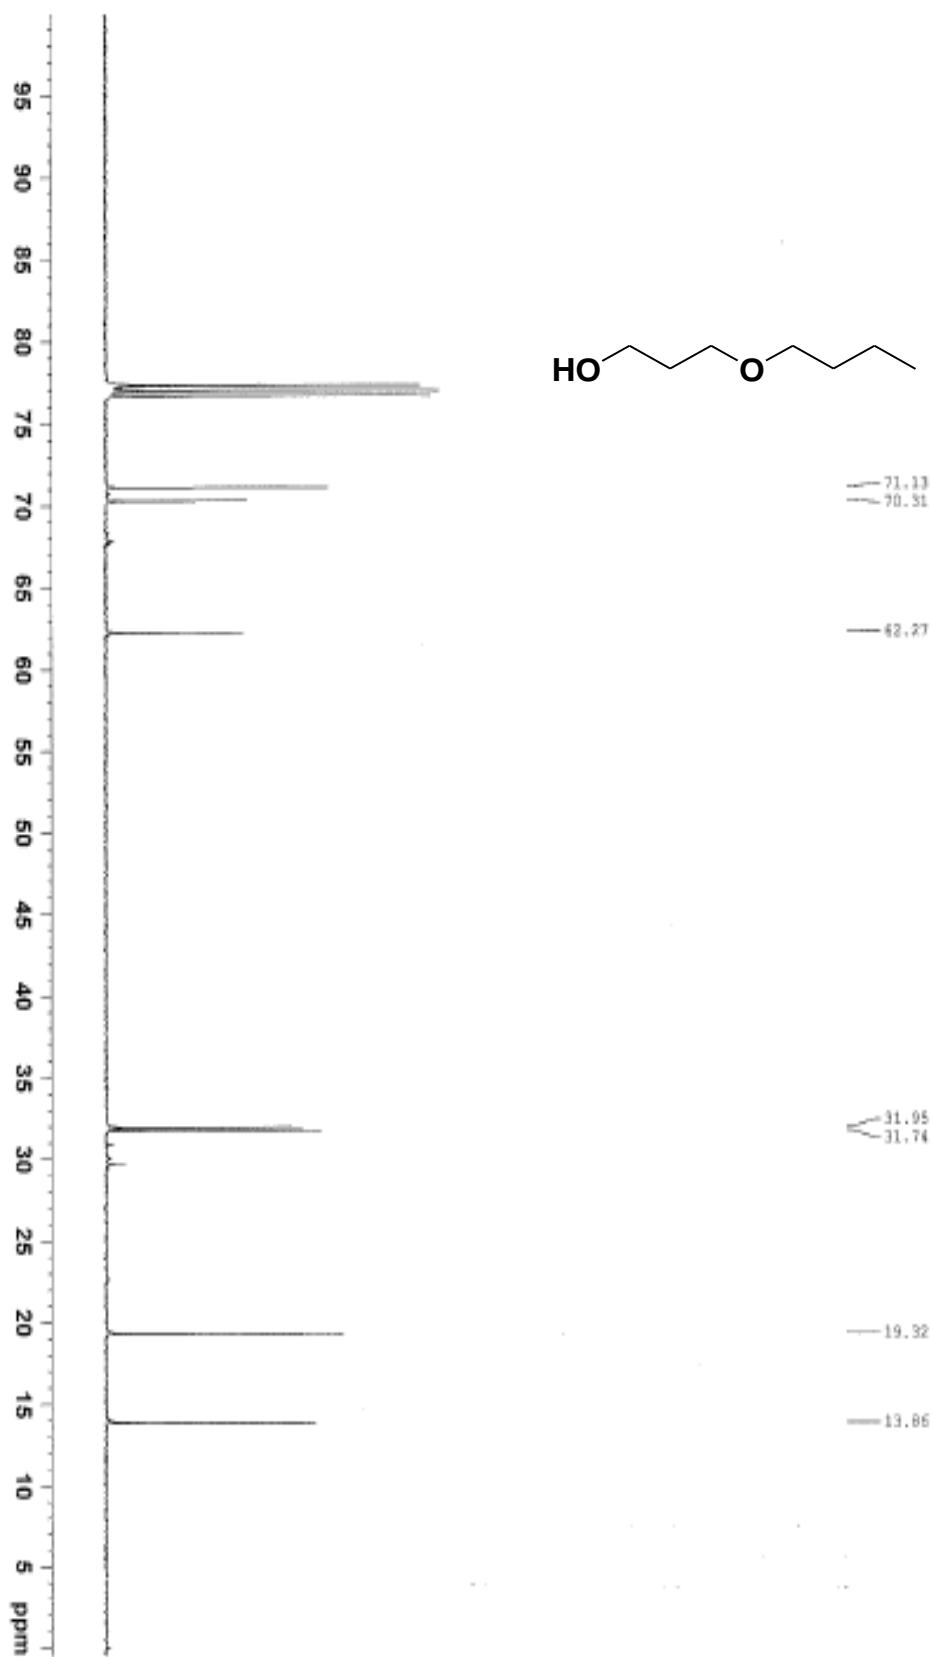

Mono ethers obtained from tris(hydroxymethyl)ethane:

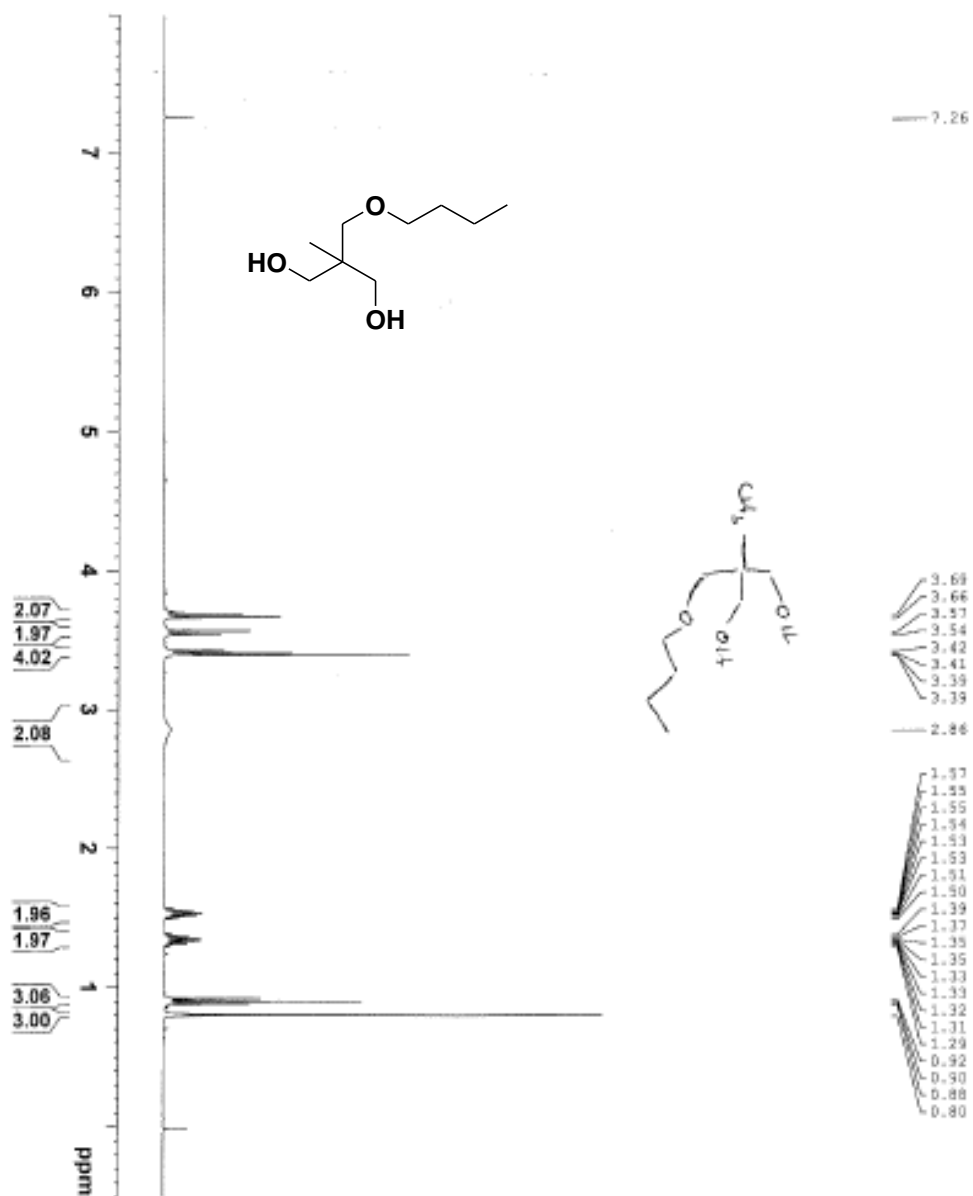

NAME R8-FRI-TRIS  
 EXPNO 1  
 PROCNO 1  
 DATE\_ 20121008  
 TIME 10.37  
 INSTRUM spect  
 F2PROC5 5 (NO F2PROC)  
 PULPROG zgpg30  
 TD 32768  
 SOLVENT CDCl3  
 NS 16  
 DS 2  
 SWH 4801.502 MHz  
 FIDRES 0.146719 MHz  
 AQ 3.4019220 sec  
 RG 60.5  
 DW 104.000 usec  
 DE 8.50 usec  
 TE 298.2 K  
 D1 1.00000000 sec  
 TDO 1

NAME CHANNEL F1  
 NUC1 1H  
 P1 12.20 usec  
 PL1 -2.20 dB  
 PL2 19.50725174 dB  
 SFO1 400.1320001 MHz  
 RT 32758  
 SF 400.1320000 MHz  
 XN1 0  
 XN2 0  
 XN3 0  
 XN4 0  
 XN5 0  
 XN6 0  
 XN7 0  
 XN8 0  
 XN9 0  
 XN10 0  
 XN11 0  
 XN12 0  
 XN13 0  
 XN14 0  
 XN15 0  
 XN16 0  
 XN17 0  
 XN18 0  
 XN19 0  
 XN20 0  
 FREQ 0.30 MHz  
 CH 0  
 CB 0  
 PC 1.00

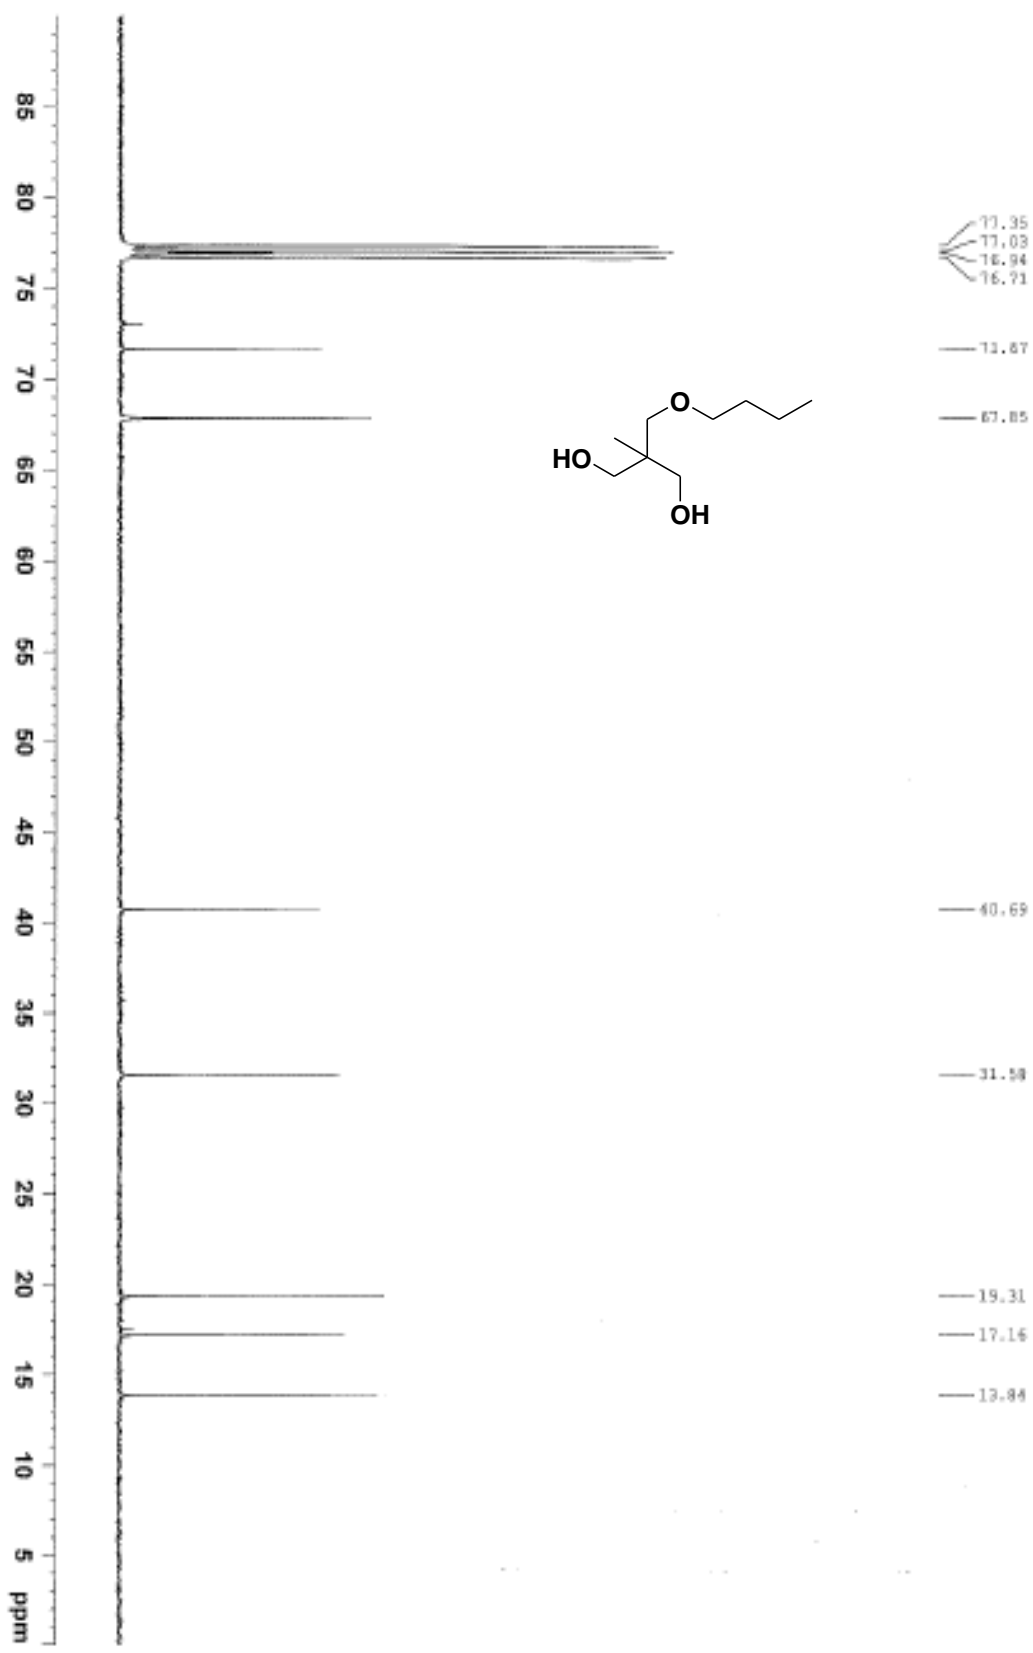

*Mono ethers obtained from isosorbide*

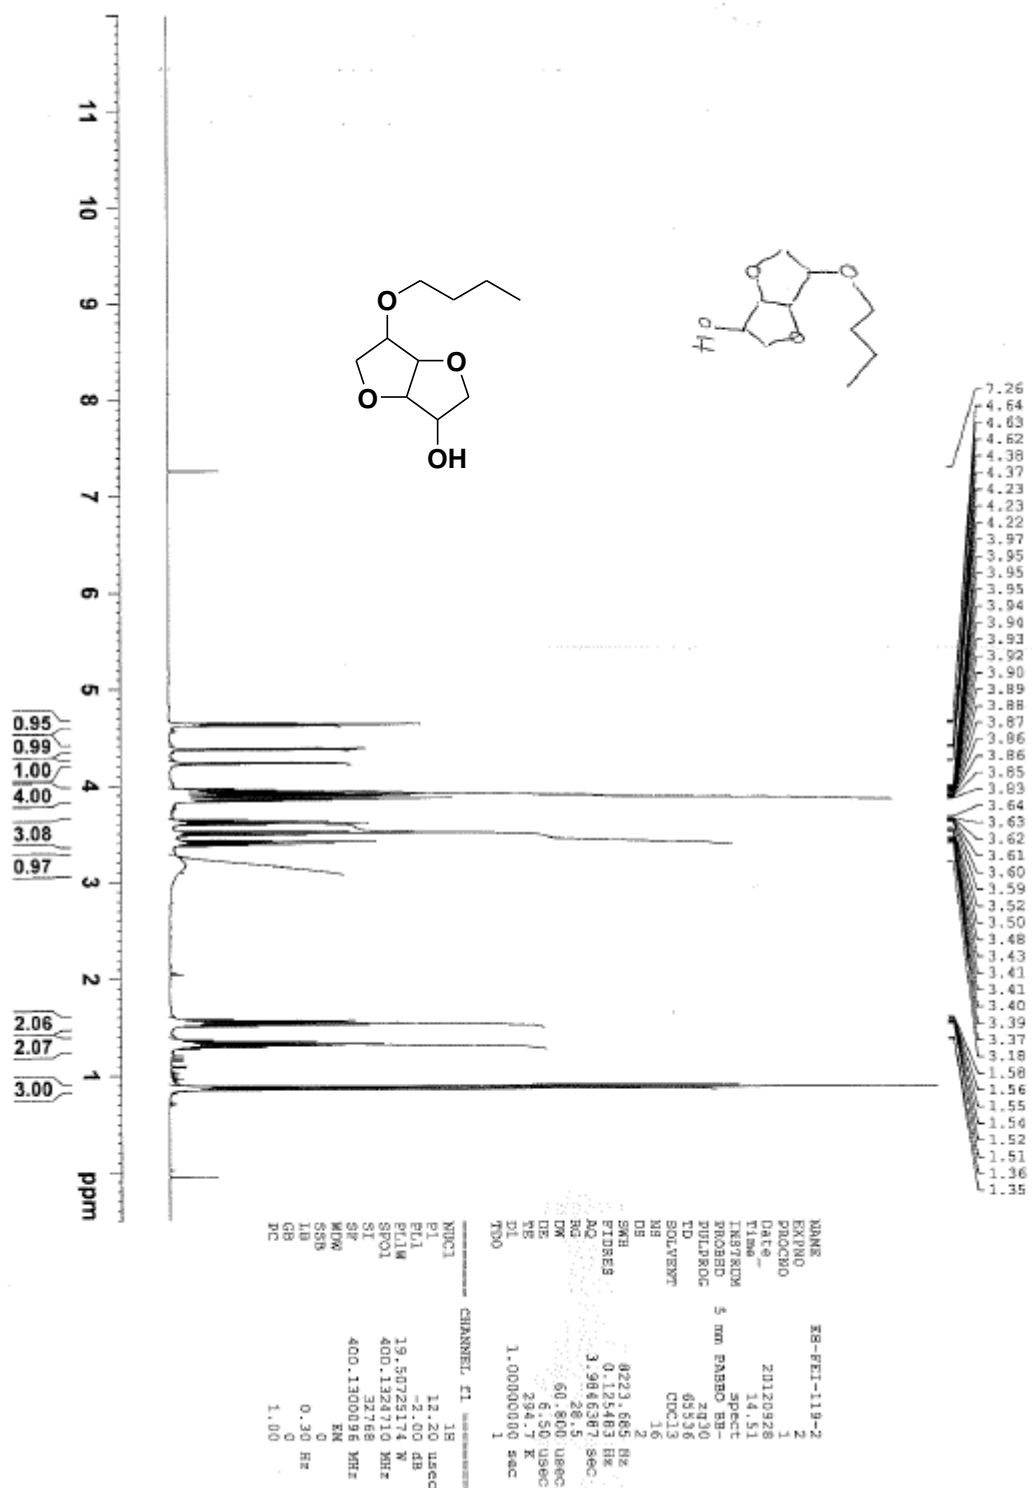

7.26  
4.64  
4.63  
4.62  
4.38  
4.37  
4.23  
4.23  
4.22  
3.97  
3.95  
3.95  
3.95  
3.94  
3.94  
3.90  
3.93  
3.92  
3.90  
3.89  
3.88  
3.87  
3.86  
3.86  
3.85  
3.83  
3.64  
3.63  
3.62  
3.61  
3.60  
3.59  
3.52  
3.50  
3.48  
3.43  
3.41  
3.41  
3.40  
3.39  
3.37  
3.18  
1.58  
1.56  
1.55  
1.54  
1.52  
1.51  
1.36  
1.35

0.95  
0.99  
1.00  
4.00  
3.08  
0.97  
2.06  
2.07  
3.00

NAME: ER-FEI-119-2  
 EXPNO: 2  
 PROCNO: 1  
 Date\_: 20120928  
 Time: 14.51  
 INSTRUM: spect  
 PROBRD: 5 mm FNBBO BB-  
 PULPROG: zg30  
 TD: 65536  
 SFO: 400.132710 MHz  
 SOLVENT: CDCl3  
 NS: 16  
 DS: 2  
 SWH: 8223.685 Hz  
 FIDRES: 0.125483 Hz  
 AQ: 3.9846387 sec  
 RG: 38.5  
 DW: 60.800 usec  
 DE: 5.50 usec  
 TE: 298.2 K  
 D1: 1.00000000 sec  
 TDO: 1

CHANNEL f1  
 NUC1: 1H  
 P1: 12.20 usec  
 PL1: -2.00 dB  
 F1: 19.50725174 MHz  
 SFO1: 400.132710 MHz  
 SI: 32768  
 SF: 400.130096 MHz  
 MDW: 0  
 SSB: 0  
 GB: 0  
 PC: 1.00



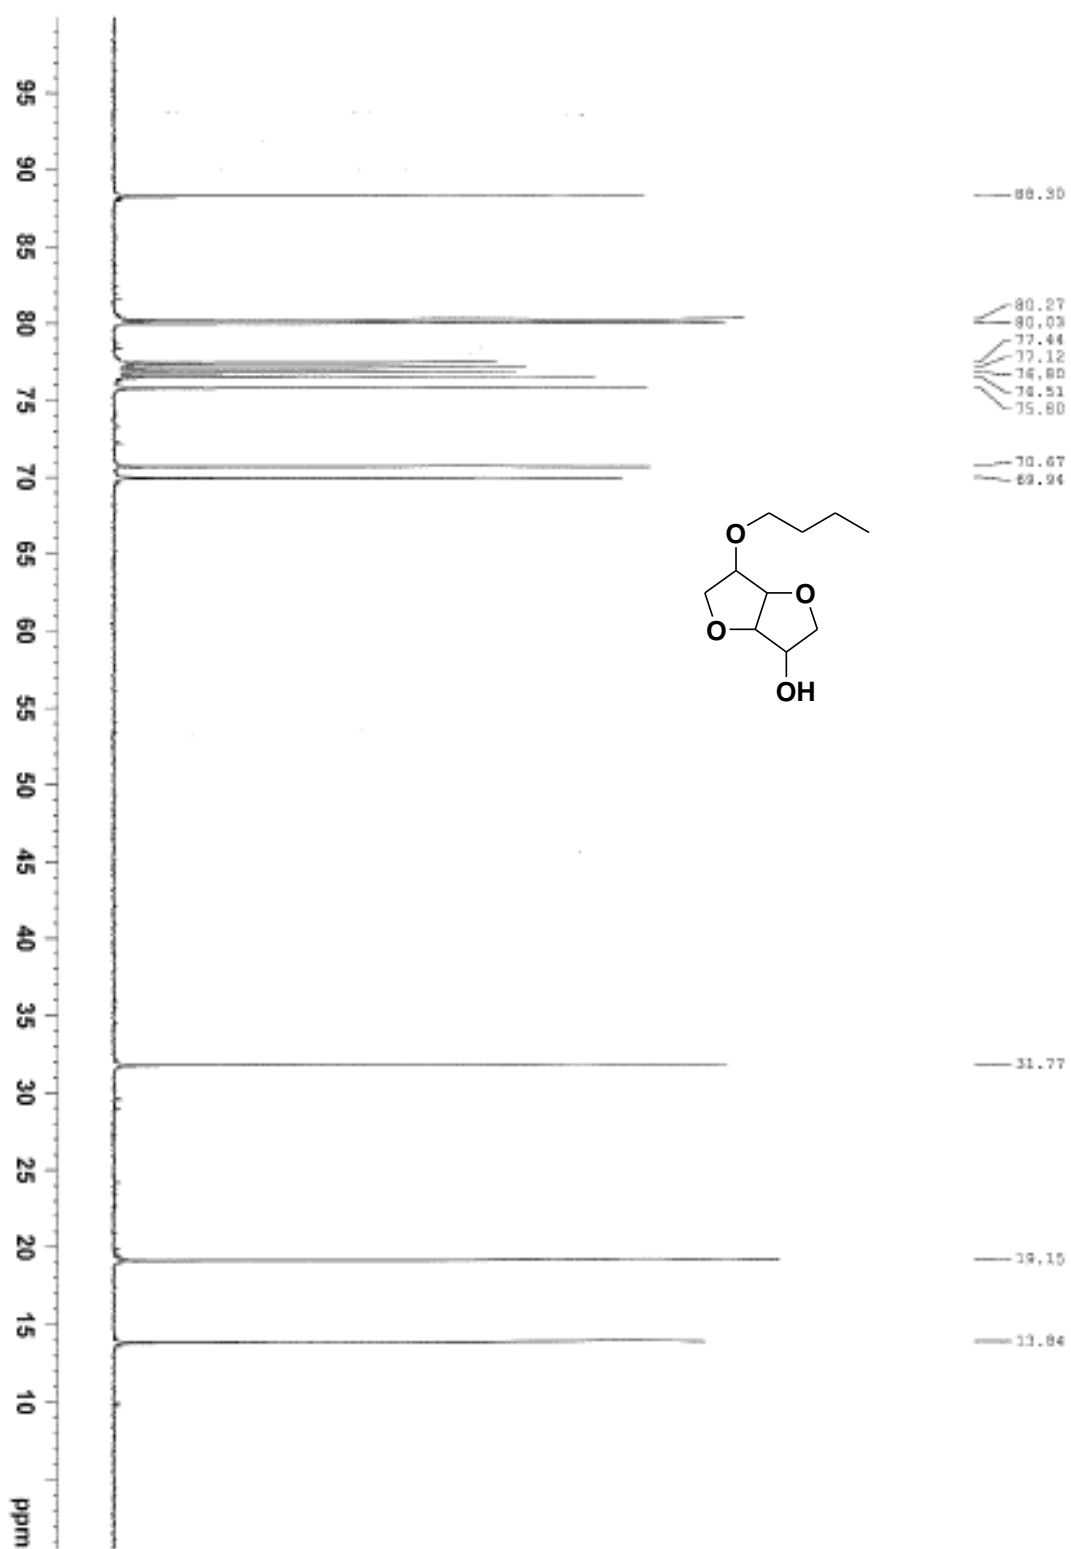

Supplement: c3gc36944g.pdf [file c3gc36944g.pdf]
